# Supplementary material for: Dual Targeting of AChE Inhibition and GPX4 Activation by Plant-Derived Compounds for the Treatment of Alzheimer’s Disease: Insights from Molecular Docking and Molecular Dynamics Simulations
Source: Research Square preprint supplement (doi:10.21203/rs.3.rs-8748563/v1), 2026-02-17
Supplement: Supplementary file 1 [file e6c2bfb268022831aa777dd1.docx]

"**Dual Targeting of AChE Inhibition and GPX4 Activation by Plant-Derived Compounds for the Treatment of Alzheimer’s Disease: Insights from Molecular Docking and Molecular Dynamics Simulations"**Suheda Rumeysa Osmanlıoğlu Dağ¹*, Mehmet Abdullah Alagöz²

1. Inonu University, Faculty of Pharmacy, Department of Pharmaceutical Botany, Malatya, Türkiye; rumeysa.osmanlioglu@inonu.edu.tr
2. Inonu University, Faculty of Pharmacy, Department of Pharmaceutical Chemistry, Malatya, Türkiye; mehmet.alagoz@inonu.edu.tr
   *Corresponding author: rumeysa.osmanlioglu@inonu.edu.tr | Tel: +90 506 9509696

| **Table Content** |  |
| --- | --- |
| **Table S1.** Phytochemical compounds ranked by composite Z-scores and C-scores indicating dual binding potential against GPX4 and AChE based on molecular docking analyses……………………………………… | **2** |
| **Table S2.** Statistical Parameters Used for Z-score Normalization | **3** |

**Table S1.** Phytochemical compounds ranked by composite Z-scores and C-scores indicating dual binding potential against GPX4 and AChE based on molecular docking analyses

| **No** | **Compound** | **Gpx4** | **Ache** | **Zgpx4** | **Zache** | **Cscore** |
| --- | --- | --- | --- | --- | --- | --- |
|  | NPACT00189 | -6,72 | -8,98 | -3,678 | -0,673 | 4,351 |
|  | NPACT01210 | -5,81 | -9,64 | -1,596 | -1,783 | 3,378 |
|  | Compound 913 | -5,78 | -9,54 | -1,527 | -1,615 | 3,142 |
|  | NPACT00845 | -6 | -9 | -2,03 | -0,707 | 2,737 |
|  | NPACT00327 | -4,78 | -10,6 | 0,761 | -3,396 | 2,635 |
|  | Compound 290 | -5,78 | -8,95 | -1,527 | -0,623 | 2,15 |
|  | NPACT00544 | -5,53 | -9,18 | -0,955 | -1,01 | 1,964 |
|  | Compound 73 | -5,01 | -9,64 | 0,235 | -1,783 | 1,548 |
|  | NPACT00378 | -5,26 | -9,19 | -0,337 | -1,026 | 1,363 |
|  | Compound 677 | -5,27 | -9,11 | -0,36 | -0,892 | 1,252 |
|  | Compound 562 | -5,92 | -8,21 | -1,847 | 0,621 | 1,226 |
|  | Compound1070 | -5,92 | -8,21 | -1,847 | 0,621 | 1,226 |
|  | NPACT00918 | -4,95 | -9,43 | 0,372 | -1,43 | 1,058 |
|  | NPACT00995 | -4,61 | -9,84 | 1,15 | -2,119 | 0,969 |
|  | NPACT00809 | -5,1 | -9,1 | 0,029 | -0,875 | 0,846 |
|  | Compound 802 | -5,72 | -8,21 | -1,39 | 0,621 | 0,769 |
|  | NPACT01553 | -5,6 | -8,28 | -1,115 | 0,503 | 0,612 |
|  | NPACT01194 | -5,73 | -8,07 | -1,413 | 0,856 | 0,556 |
|  | NPACT00800 | -4,84 | -9,23 | 0,624 | -1,094 | 0,47 |
|  | NPACT00341 | -4,79 | -9,25 | 0,738 | -1,127 | 0,389 |
|  | NPACT00384 | -5,41 | -8,39 | -0,68 | 0,318 | 0,362 |
|  | Compound 314 | -5,25 | -8,6 | -0,314 | -0,035 | 0,349 |
|  | NPACT00381 | -5,48 | -8,28 | -0,841 | 0,503 | 0,337 |
|  | NPACT00212 | -4,74 | -9,26 | 0,853 | -1,144 | 0,291 |
|  | NPACT00944 | -4,5 | -9,54 | 1,402 | -1,615 | 0,213 |
|  | NPACT00808 | -5,38 | -8,3 | -0,612 | 0,47 | 0,142 |
|  | NPACT00680 | -4,9 | -8,95 | 0,487 | -0,623 | 0,136 |
|  | NPACT00923 | -4,92 | -8,9 | 0,441 | -0,539 | 0,098 |
|  | Compound 446 | -5,12 | -8,62 | -0,017 | -0,068 | 0,085 |
|  | Compound 1092 | -4,82 | -8,93 | 0,67 | -0,589 | -0,08 |
|  | Compound 833 | -4,95 | -8,73 | 0,372 | -0,253 | -0,119 |
|  | NPACT00757 | -4,97 | -8,7 | 0,326 | -0,203 | -0,124 |
|  | NPACT00660 | -4,8 | -8,93 | 0,715 | -0,589 | -0,126 |
|  | NPACT00553 | -4,96 | -8,66 | 0,349 | -0,135 | -0,214 |
|  | NPACT01533 | -5,68 | -7,67 | -1,298 | 1,529 | -0,231 |
|  | NPACT00878 | -5,23 | -8,28 | -0,269 | 0,503 | -0,235 |
|  | NPACT00272 | -4,5 | -9,26 | 1,402 | -1,144 | -0,258 |
|  | Compound 532 | -5,05 | -8,48 | 0,143 | 0,167 | -0,31 |
|  | Compound 162 | -5,14 | -8,31 | -0,063 | 0,453 | -0,39 |
|  | NPACT00930 | -5,3 | -8,09 | -0,429 | 0,823 | -0,394 |
|  | NPACT01554 | -5,45 | -7,87 | -0,772 | 1,192 | -0,421 |
|  | Compound 413 | -5,06 | -8,39 | 0,12 | 0,318 | -0,439 |
|  | NPACT00031 | -5,17 | -8,19 | -0,131 | 0,655 | -0,523 |
|  | Compound 1105 | -4,88 | -8,56 | 0,532 | 0,033 | -0,565 |
|  | NPACT00083 | -5,24 | -8,05 | -0,291 | 0,89 | -0,599 |
|  | NPACT00669 | -5,41 | -7,76 | -0,68 | 1,377 | -0,697 |
|  | NPACT00540 | -4,97 | -8,34 | 0,326 | 0,402 | -0,729 |
|  | NPACT00511 | -4,82 | -8,54 | 0,67 | 0,066 | -0,736 |
|  | NPACT00262 | -4,95 | -8,36 | 0,372 | 0,369 | -0,741 |
|  | NPACT00543 | -4,61 | -8,82 | 1,15 | -0,404 | -0,746 |
|  | Compound 875 | -5,37 | -7,76 | -0,589 | 1,377 | -0,789 |
|  | NPACT00708 | -5,22 | -7,91 | -0,246 | 1,125 | -0,88 |
|  | NPACT00807 | -4,57 | -8,79 | 1,242 | -0,354 | -0,888 |
|  | NPACT00035 | -4,87 | -8,31 | 0,555 | 0,453 | -1,008 |
|  | Compound 495 | -4,72 | -8,5 | 0,898 | 0,133 | -1,032 |
|  | NPACT00542 | -4,98 | -8,08 | 0,304 | 0,839 | -1,143 |
|  | NPACT00742 | -4,89 | -8,19 | 0,509 | 0,655 | -1,164 |
|  | Compound 110 | -5,06 | -7,89 | 0,12 | 1,159 | -1,279 |
|  | NPACT01309 | -4,7 | -8,3 | 0,944 | 0,47 | -1,414 |
|  | NPACT00981 | -4,71 | -8,28 | 0,921 | 0,503 | -1,425 |
|  | NPACT00376 | -4,78 | -8,13 | 0,761 | 0,755 | -1,517 |
|  | NPACT00949 | -5,01 | -7,8 | 0,235 | 1,31 | -1,545 |
|  | NPACT00383 | -4,75 | -8,04 | 0,83 | 0,907 | -1,736 |
|  | NPACT00545 | -4,79 | -7,96 | 0,738 | 1,041 | -1,779 |
|  | Compound 1098 | -4,8 | -7,85 | 0,715 | 1,226 | -1,941 |
|  | NPACT00677 | -4,55 | -8,16 | 1,287 | 0,705 | -1,992 |
|  | NPACT00088 | -4,57 | -8,07 | 1,242 | 0,856 | -2,098 |
|  | NPACT00799 | -4,54 | -7,96 | 1,31 | 1,041 | -2,351 |

**Table S2.** Statistical Parameters Used for Z-score Normalization

| **Parameter** | **GPX4 Docking Scores** | **AChE Docking Scores** |
| --- | --- | --- |
| **Mean (***µ*) | -5.113 kcal/mol | -8.579 kcal/mol |
| **Standard Deviation (***σ*) | 0.437 kcal/mol | 0.595 kcal/mol |
